# Supplementary material
Source: PubMed Central journal article supplement (PMC10014942)
Supplement: 41467_2023_36745_MOESM3_ESM.pdf [file 41467_2023_36745_MOESM3_ESM.pdf]

**Description of Additional Supplementary Information File**

**Title:** Supplementary Data

**Description:** Analysis of the impact of amino acid changes on the kch and HDX of spike variants.
